# Supplementary material
Source: publisher figshare collection journal article supplement (https://karger.figshare.com/ndownloader/files/14687467)
Supplement: Supplementary file 1 [file 14687467]

*Note.* Results presented as Mean (Standard Deviation). W= Wave. EPA = Everyday Physical Activity. EF = Executive Function. BMI = Body Mass Index. PP = Pulse Pressure. MMSE = Mini Mental State Exam. Education, EPA, mobility, BMI, PP, MMSE scores presented here are at W1. *APOE* ɛ2ɛ4 removed for analysis; n = 25. Adapted from Thibeau et al., 2017.
